# Supplementary material
Source: Springer Nature journal article supplement (https://repositorio.tec.mx/ortec/bitstream/handle/11285/613663/12914_2003_12_MOESM6_ESM.pdf)
Supplement: MOESM6 [file 12914_2003_12_MOESM6_ESM.pdf]

Table 5. Percentage distribution of women who reported receiving a method, appointment or referral

| Characteristic                             | Baseline |    | Post-intervention |    | Follow-Up |    |
|--------------------------------------------|----------|----|-------------------|----|-----------|----|
|                                            | %        | N  | %                 | N  | %         | N  |
| Received a Method only                     |          |    |                   |    |           |    |
| Intervention Group*                        | 0.4      | 2  | 9.9               | 28 | 4.8       | 13 |
| Comparison Group**                         | 0.9      | 3  | 0.5               | 1  | 3.0       | 7  |
| Received a Method, Appointment or Referral |          |    |                   |    |           |    |
| Intervention Group***                      | 3.1      | 14 | 17.4              | 49 | 18.5      | 50 |
| Comparison Group                           | 5.2      | 23 | 6.6               | 13 | 9.2       | 22 |

\* Difference from baseline to post-intervention statistically significant at  $p \leq .000$ .

\*\*Difference from baseline to follow-up statistically significant at  $p \leq .044$ .

\*\*\* Difference from baseline to post-intervention statistically significant at  $p \leq .000$ .
